# Supplementary material for: Ecological analysis of Kashin-Beck osteoarthropathy risk factors in Tibet’s Qamdo City, China
Source: PubMed Central journal article supplement (PMC6385338; doi:10.1038/s41598-019-39792-0), 2019-02-21
Supplement: 41598_2019_39792_MOESM1_ESM.pdf [file 41598_2019_39792_MOESM1_ESM.pdf]

# Ecological analysis of Kashin-Beck osteoarthropathy risk factors in Tibet's Qamdo Prefecture, China

Xinjie Zha<sup>1,2</sup>, Xing Gao<sup>1,\*</sup>

<sup>1</sup>State Key Laboratory of Resources and Environmental Information System, Institute of Geographic Sciences and Natural Resources Research, Chinese Academy of Sciences, Beijing 100101, China

<sup>2</sup>University of Chinese Academy of Sciences, Beijing 100049, China

\*Corresponding. [gxing@igsnr.ac.cn](mailto:gxing@igsnr.ac.cn)

| <b>C=A∩B</b>  | <b>A</b> | <b>B</b> | <b>D=A+B</b> | <b>Result</b>   | <b>Interaction</b> |
|---------------|----------|----------|--------------|-----------------|--------------------|
| TEC∩MI=0.777  | 0.560    | 0.334    | 0.894        | C<D; C>Max(A,B) | ↑                  |
| MI∩GDP=0.760  | 0.334    | 0.314    | 0.648        | C>D; C>Max(A,B) | ↑↑                 |
| TEC∩STR=0.731 | 0.560    | 0.467    | 1.027        | C<D; C>Max(A,B) | ↑                  |
| STR∩GDP=0.710 | 0.467    | 0.314    | 0.781        | C<D; C>Max(A,B) | ↑                  |
| MI∩PRE=0.689  | 0.334    | 0.294    | 0.628        | C>D; C>Max(A,B) | ↑↑                 |
| STR∩MI=0.682  | 0.467    | 0.334    | 0.801        | C<D; C>Max(A,B) | ↑                  |
| STR∩PRE=0.679 | 0.467    | 0.294    | 0.761        | C<D; C>Max(A,B) | ↑                  |
| TEC∩PRE=0.674 | 0.560    | 0.294    | 0.854        | C<D; C>Max(A,B) | ↑                  |
| TEC∩GDP=0.673 | 0.560    | 0.314    | 0.874        | C<D; C>Max(A,B) | ↑                  |
| TEC∩TEM=0.640 | 0.560    | 0.051    | 0.611        | C>D; C>Max(A,B) | ↑↑                 |
| GDP∩PRE=0.628 | 0.314    | 0.294    | 0.608        | C>D; C>Max(A,B) | ↑↑                 |
| TEC∩SOI=0.614 | 0.560    | 0.117    | 0.677        | C<D; C>Max(A,B) | ↑                  |
| ELE∩TEC=0.597 | 0.560    | 0.081    | 0.641        | C<D; C>Max(A,B) | ↑                  |
| VEG∩TEC=0.595 | 0.560    | 0.043    | 0.603        | C<D; C>Max(A,B) | ↑                  |
| GEO∩TEC=0.592 | 0.560    | 0.042    | 0.602        | C<D; C>Max(A,B) | ↑                  |
| GRO∩TEC=0.573 | 0.560    | 0.088    | 0.648        | C<D; C>Max(A,B) | ↑                  |
| GEO∩STR=0.573 | 0.467    | 0.042    | 0.509        | C>D; C>Max(A,B) | ↑↑                 |
| SD∩TEC=0.563  | 0.560    | 0.012    | 0.572        | C<D; C>Max(A,B) | ↑                  |
| SA∩TEC=0.562  | 0.560    | 0.003    | 0.563        | C<D; C>Max(A,B) | ↑                  |
| GRO∩STR=0.556 | 0.467    | 0.088    | 0.555        | C>D; C>Max(A,B) | ↑↑                 |
| TEM∩STR=0.55  | 0.467    | 0.051    | 0.518        | C>D; C>Max(A,B) | ↑↑                 |
| SOI∩STR=0.545 | 0.467    | 0.117    | 0.584        | C<D; C>Max(A,B) | ↑                  |
| ELE∩STR=0.534 | 0.467    | 0.081    | 0.548        | C<D; C>Max(A,B) | ↑                  |
| GRO∩GDP=0.518 | 0.314    | 0.088    | 0.402        | C>D; C>Max(A,B) | ↑↑                 |
| VEG∩STR=0.514 | 0.467    | 0.043    | 0.510        | C>D; C>Max(A,B) | ↑↑                 |
| SD∩STR=0.482  | 0.467    | 0.012    | 0.479        | C>D; C>Max(A,B) | ↑↑                 |
| SA∩STR=0.477  | 0.467    | 0.003    | 0.470        | C>D; C>Max(A,B) | ↑↑                 |

|               |       |       |       |                 |    |
|---------------|-------|-------|-------|-----------------|----|
| GRO∩PRE=0.456 | 0.294 | 0.088 | 0.382 | C>D; C>Max(A,B) | ↑↑ |
| TEM∩PRE=0.428 | 0.294 | 0.051 | 0.345 | C>D; C>Max(A,B) | ↑↑ |
| SOI∩PRE=0.419 | 0.294 | 0.117 | 0.411 | C>D; C>Max(A,B) | ↑↑ |
| GEO∩PRE=0.416 | 0.294 | 0.042 | 0.336 | C>D; C>Max(A,B) | ↑↑ |
| GEO∩GDP=0.412 | 0.314 | 0.042 | 0.356 | C>D; C>Max(A,B) | ↑↑ |
| SOI∩MI=0.405  | 0.334 | 0.117 | 0.451 | C<D; C>Max(A,B) | ↑  |
| SOI∩GDP=0.391 | 0.314 | 0.117 | 0.431 | C<D; C>Max(A,B) | ↑  |
| VEG∩GDP=0.391 | 0.314 | 0.043 | 0.357 | C>D; C>Max(A,B) | ↑↑ |
| ELE∩PRE=0.39  | 0.294 | 0.081 | 0.375 | C>D; C>Max(A,B) | ↑↑ |
| GRO∩MI=0.385  | 0.334 | 0.088 | 0.422 | C<D; C>Max(A,B) | ↑  |
| TEM∩GDP=0.385 | 0.314 | 0.051 | 0.365 | C>D; C>Max(A,B) | ↑↑ |
| VEG∩MI=0.384  | 0.334 | 0.043 | 0.377 | C>D; C>Max(A,B) | ↑↑ |
| GEO∩MI=0.382  | 0.334 | 0.042 | 0.376 | C>D; C>Max(A,B) | ↑↑ |
| ELE∩MI=0.374  | 0.334 | 0.081 | 0.415 | C<D; C>Max(A,B) | ↑  |
| TEM∩MI=0.371  | 0.334 | 0.051 | 0.385 | C<D; C>Max(A,B) | ↑  |
| ELE∩GDP=0.369 | 0.314 | 0.081 | 0.395 | C<D; C>Max(A,B) | ↑  |
| SD∩MI=0.347   | 0.334 | 0.012 | 0.346 | C>D; C>Max(A,B) | ↑↑ |
| SD∩GDP=0.343  | 0.314 | 0.012 | 0.326 | C>D; C>Max(A,B) | ↑↑ |
| SA∩MI=0.342   | 0.334 | 0.003 | 0.337 | C>D; C>Max(A,B) | ↑↑ |
| VEG∩PRE=0.341 | 0.294 | 0.043 | 0.337 | C>D; C>Max(A,B) | ↑↑ |
| SA∩GDP=0.319  | 0.314 | 0.003 | 0.317 | C>D; C>Max(A,B) | ↑↑ |
| SA∩PRE=0.304  | 0.294 | 0.003 | 0.297 | C>D; C>Max(A,B) | ↑↑ |
| SD∩PRE=0.302  | 0.294 | 0.012 | 0.306 | C<D; C>Max(A,B) | ↑  |
| GEO∩SOI=0.19  | 0.117 | 0.042 | 0.159 | C>D; C>Max(A,B) | ↑↑ |
| VEG∩SOI=0.168 | 0.117 | 0.043 | 0.160 | C>D; C>Max(A,B) | ↑↑ |
| GRO∩SOI=0.167 | 0.117 | 0.088 | 0.205 | C<D; C>Max(A,B) | ↑  |
| ELE∩SOI=0.155 | 0.117 | 0.081 | 0.198 | C<D; C>Max(A,B) | ↑  |
| GEO∩GRO=0.155 | 0.088 | 0.042 | 0.130 | C>D; C>Max(A,B) | ↑↑ |
| GEO∩ELE=0.154 | 0.081 | 0.042 | 0.123 | C>D; C>Max(A,B) | ↑↑ |
| TEM∩SOI=0.151 | 0.117 | 0.051 | 0.168 | C<D; C>Max(A,B) | ↑  |
| VEG∩GRO=0.146 | 0.088 | 0.043 | 0.131 | C>D; C>Max(A,B) | ↑↑ |
| SD∩SOI=0.144  | 0.117 | 0.012 | 0.129 | C>D; C>Max(A,B) | ↑↑ |
| TEM∩ELE=0.133 | 0.081 | 0.051 | 0.132 | C>D; C>Max(A,B) | ↑↑ |
| ELE∩GRO=0.131 | 0.088 | 0.081 | 0.169 | C<D; C>Max(A,B) | ↑  |
| VEG∩ELE=0.126 | 0.081 | 0.043 | 0.124 | C>D; C>Max(A,B) | ↑↑ |
| SA∩SOI=0.122  | 0.117 | 0.003 | 0.120 | C>D; C>Max(A,B) | ↑↑ |
| SD∩ELE=0.119  | 0.081 | 0.012 | 0.093 | C>D; C>Max(A,B) | ↑↑ |
| TEM∩GRO=0.117 | 0.088 | 0.051 | 0.139 | C<D; C>Max(A,B) | ↑  |
| GEO∩TEM=0.114 | 0.051 | 0.042 | 0.093 | C>D; C>Max(A,B) | ↑↑ |
| VEG∩TEM=0.102 | 0.051 | 0.043 | 0.094 | C>D; C>Max(A,B) | ↑↑ |
| SD∩GRO=0.101  | 0.088 | 0.012 | 0.100 | C>D; C>Max(A,B) | ↑↑ |
| GEO∩VEG=0.098 | 0.043 | 0.042 | 0.085 | C>D; C>Max(A,B) | ↑↑ |

|                     |       |       |       |                               |    |
|---------------------|-------|-------|-------|-------------------------------|----|
| $SA \cap GRO=0.09$  | 0.088 | 0.003 | 0.091 | $C < D; C > \text{Max}(A, B)$ | ↑  |
| $SD \cap TEM=0.086$ | 0.051 | 0.012 | 0.063 | $C > D; C > \text{Max}(A, B)$ | ↑↑ |
| $SA \cap ELE=0.085$ | 0.081 | 0.003 | 0.084 | $C > D; C > \text{Max}(A, B)$ | ↑↑ |
| $SD \cap GEO=0.074$ | 0.042 | 0.012 | 0.054 | $C > D; C > \text{Max}(A, B)$ | ↑↑ |
| $SA \cap TEM=0.059$ | 0.051 | 0.003 | 0.054 | $C > D; C > \text{Max}(A, B)$ | ↑↑ |
| $SD \cap VEG=0.053$ | 0.043 | 0.012 | 0.055 | $C < D; C > \text{Max}(A, B)$ | ↑  |
| $SA \cap GEO=0.05$  | 0.042 | 0.003 | 0.045 | $C > D; C > \text{Max}(A, B)$ | ↑↑ |
| $SA \cap VEG=0.048$ | 0.043 | 0.003 | 0.046 | $C > D; C > \text{Max}(A, B)$ | ↑↑ |
| $SA \cap SD=0.018$  | 0.012 | 0.003 | 0.015 | $C > D; C > \text{Max}(A, B)$ | ↑↑ |

**Table S1. Interactive q-statistic values between pairs of risk factors.** “↑” denotes A and B bivariate enhance each other; “↑↑” denotes nonlinear enhancement of A and B. The 13 risk factors (TEC, STR, MI, GDP, PRE, SOI, GRO, ELE, TEM, VEG, GEO, SD and SA) are all included.

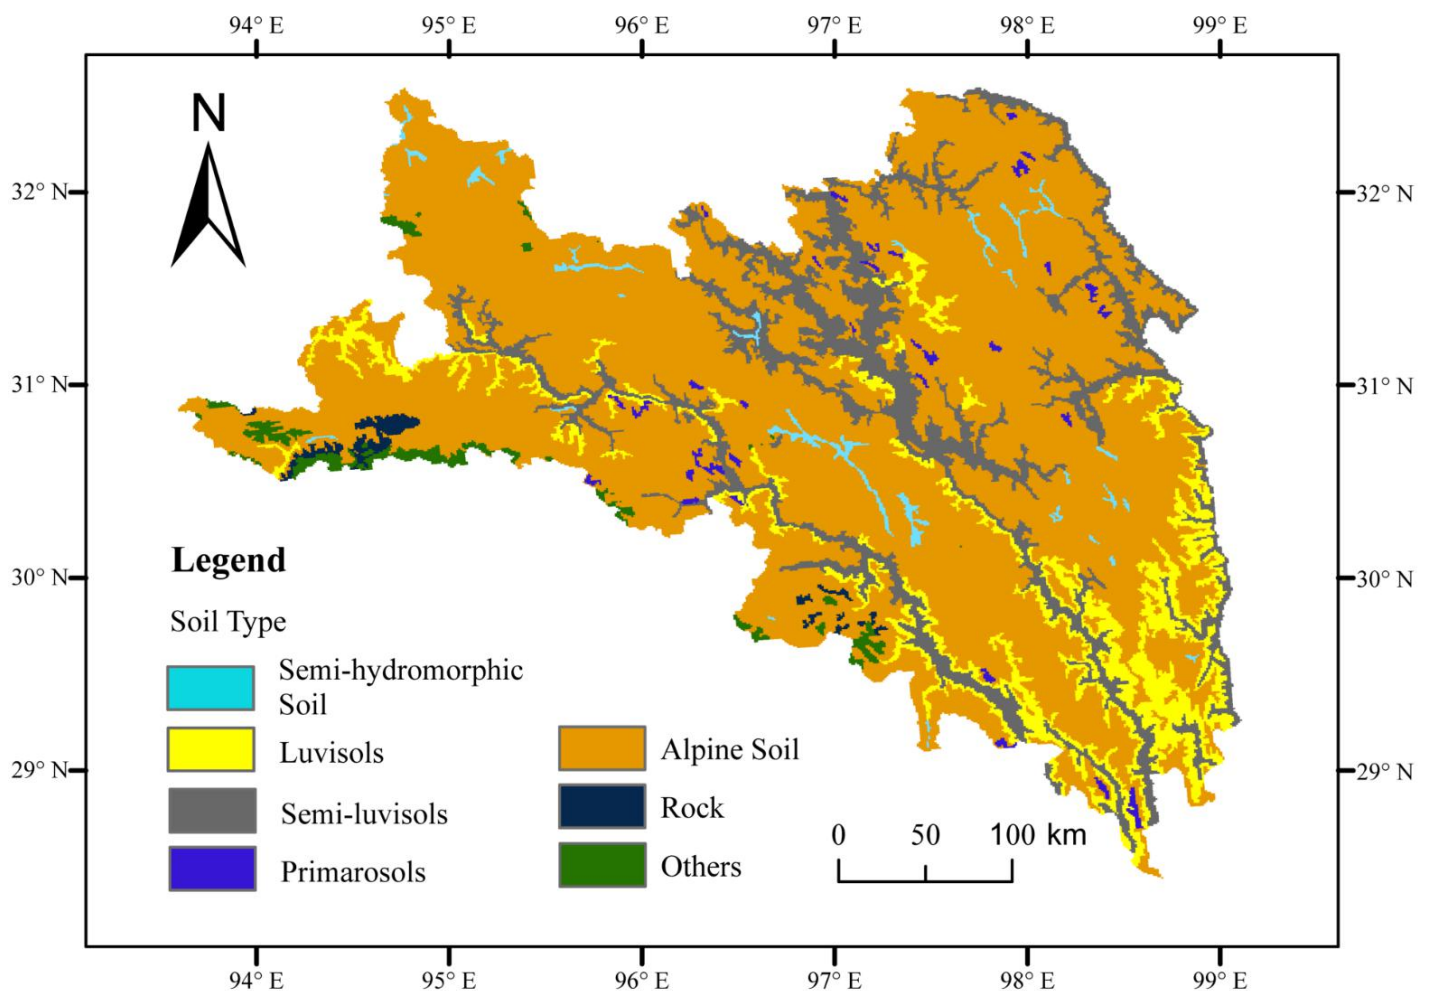

**Figure S1. Soil types of the Qamdo prefecture.** It was generated by ArcGIS 10.2 (<http://www.esri.com/>).

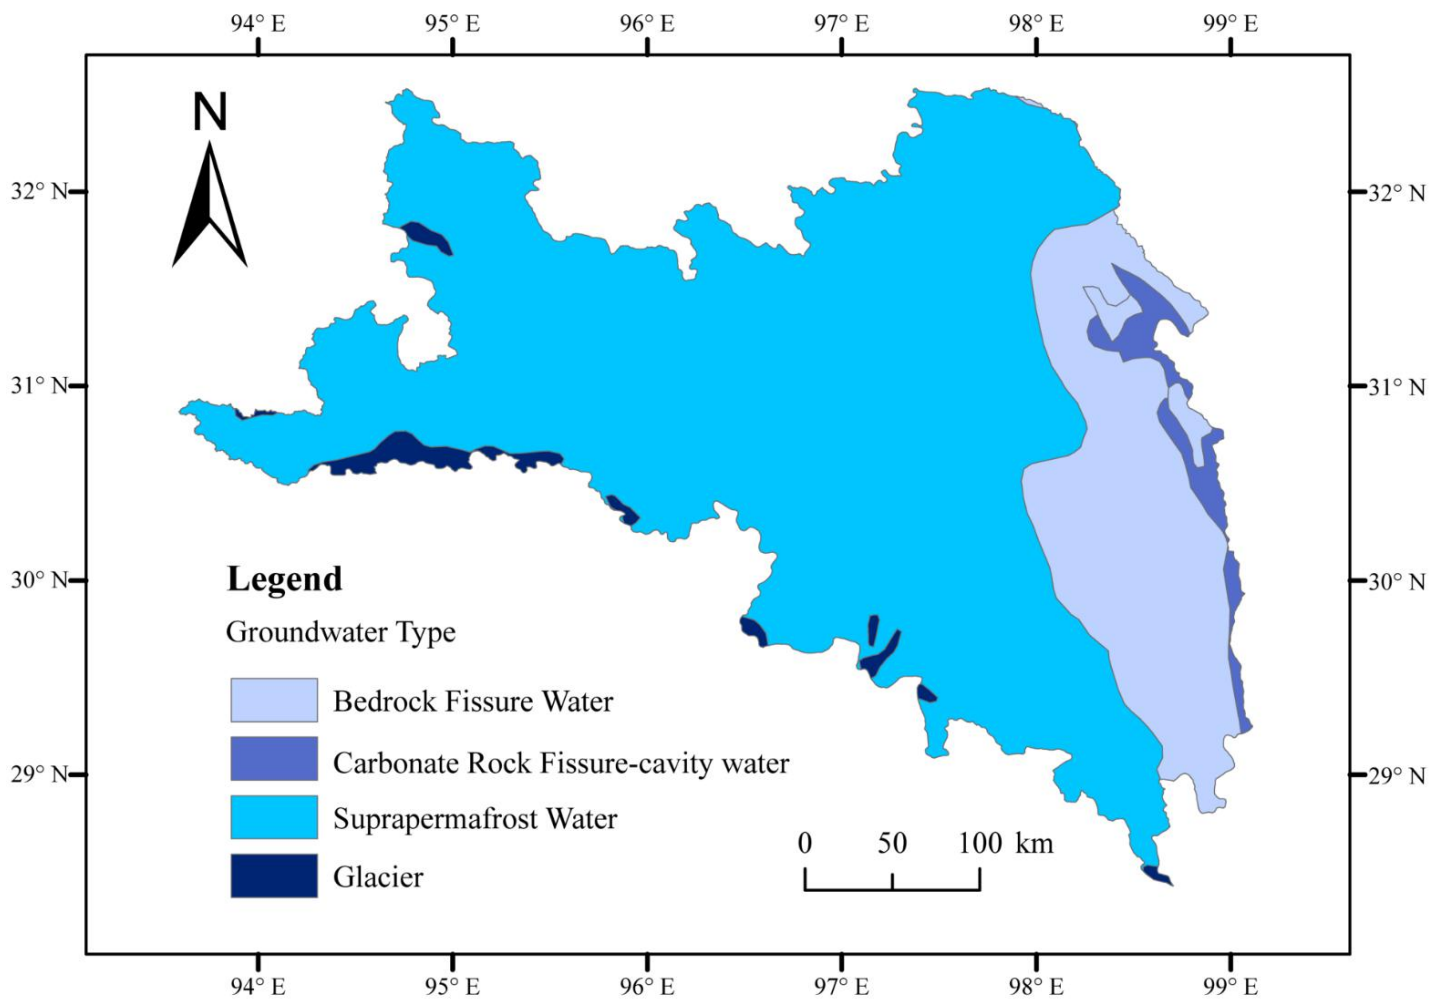

**Figure S2. Groundwater types of the Qamdo prefecture.** It was generated by ArcGIS 10.2 (<http://www.esri.com/>).

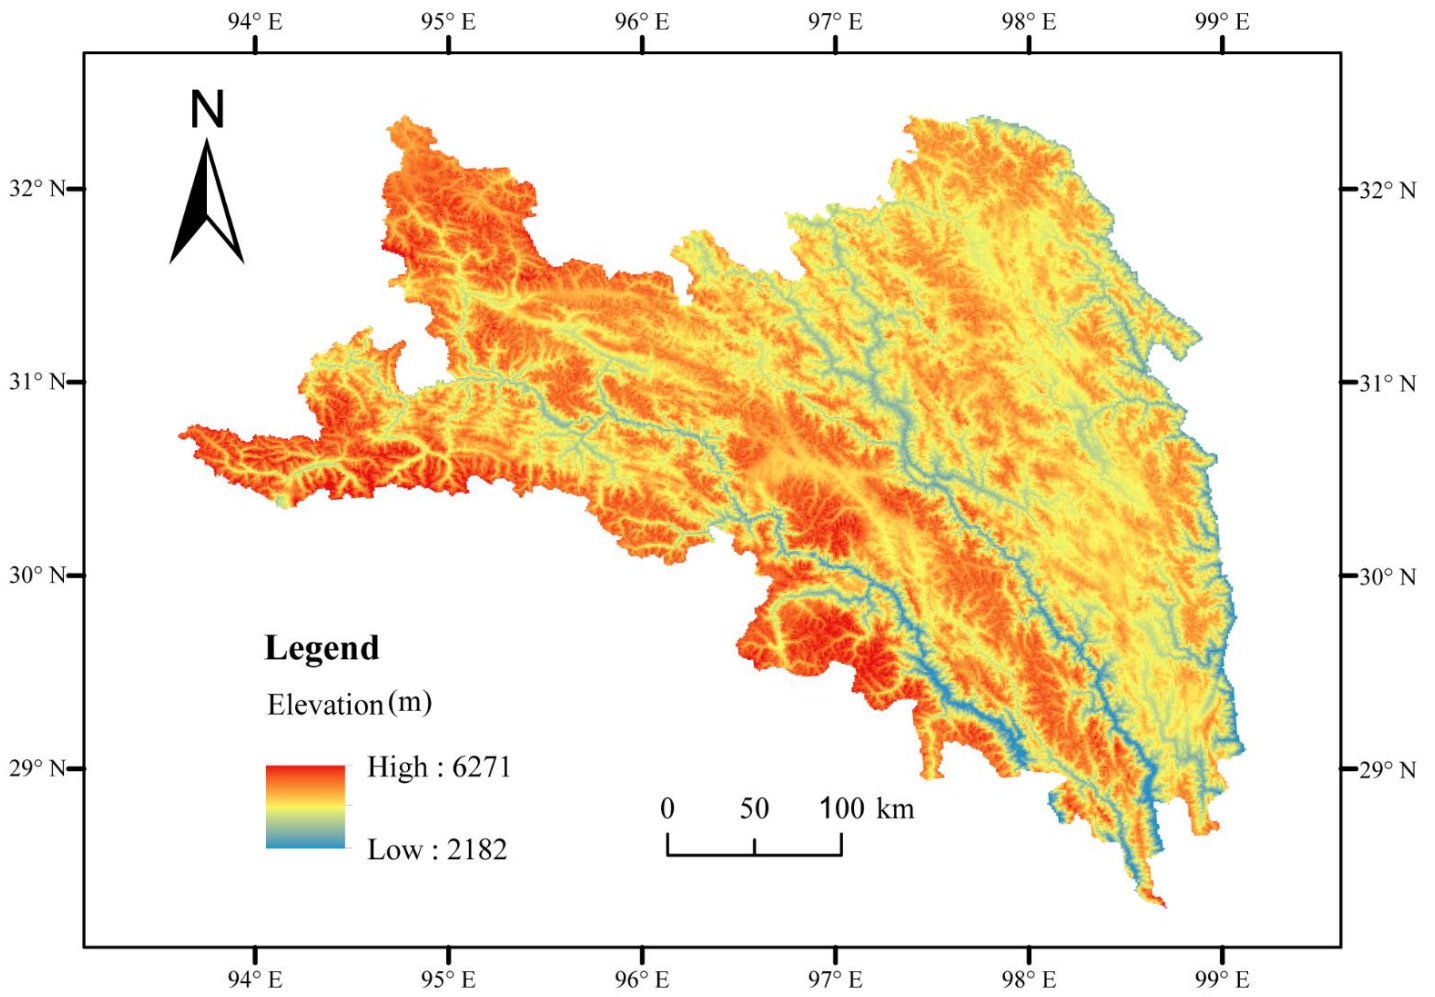

Figure S3. Elevation of the Qamdo prefecture. It was generated by ArcGIS 10.2 (<http://www.esri.com/>).

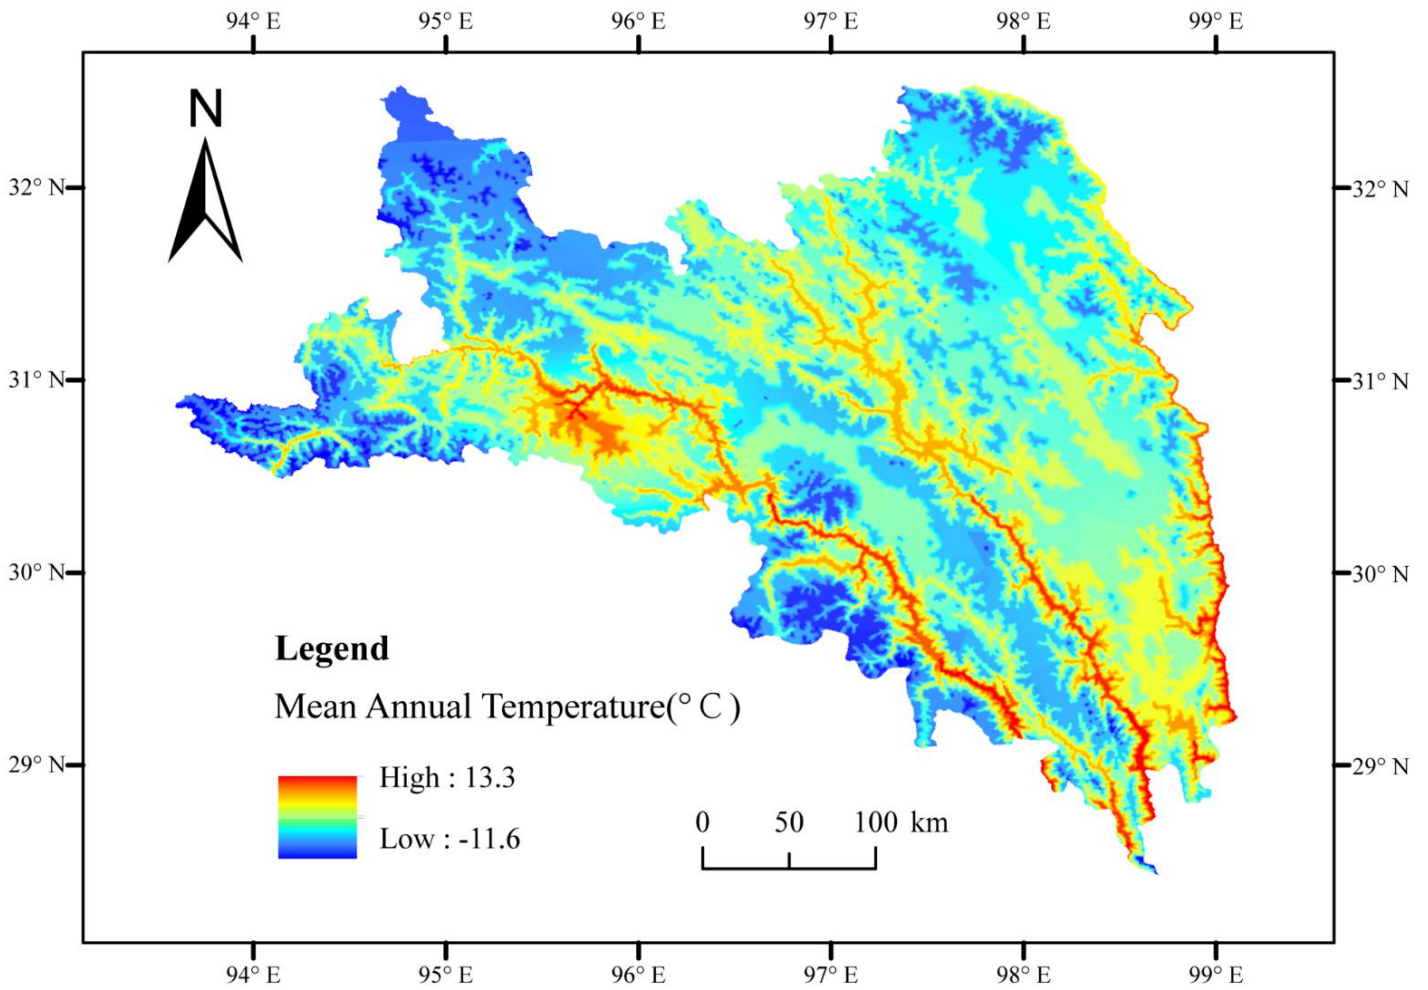

**Figure S4. Mean annual temperature of the Qamdo prefecture.** It was generated by ArcGIS 10.2 (<http://www.esri.com/>).

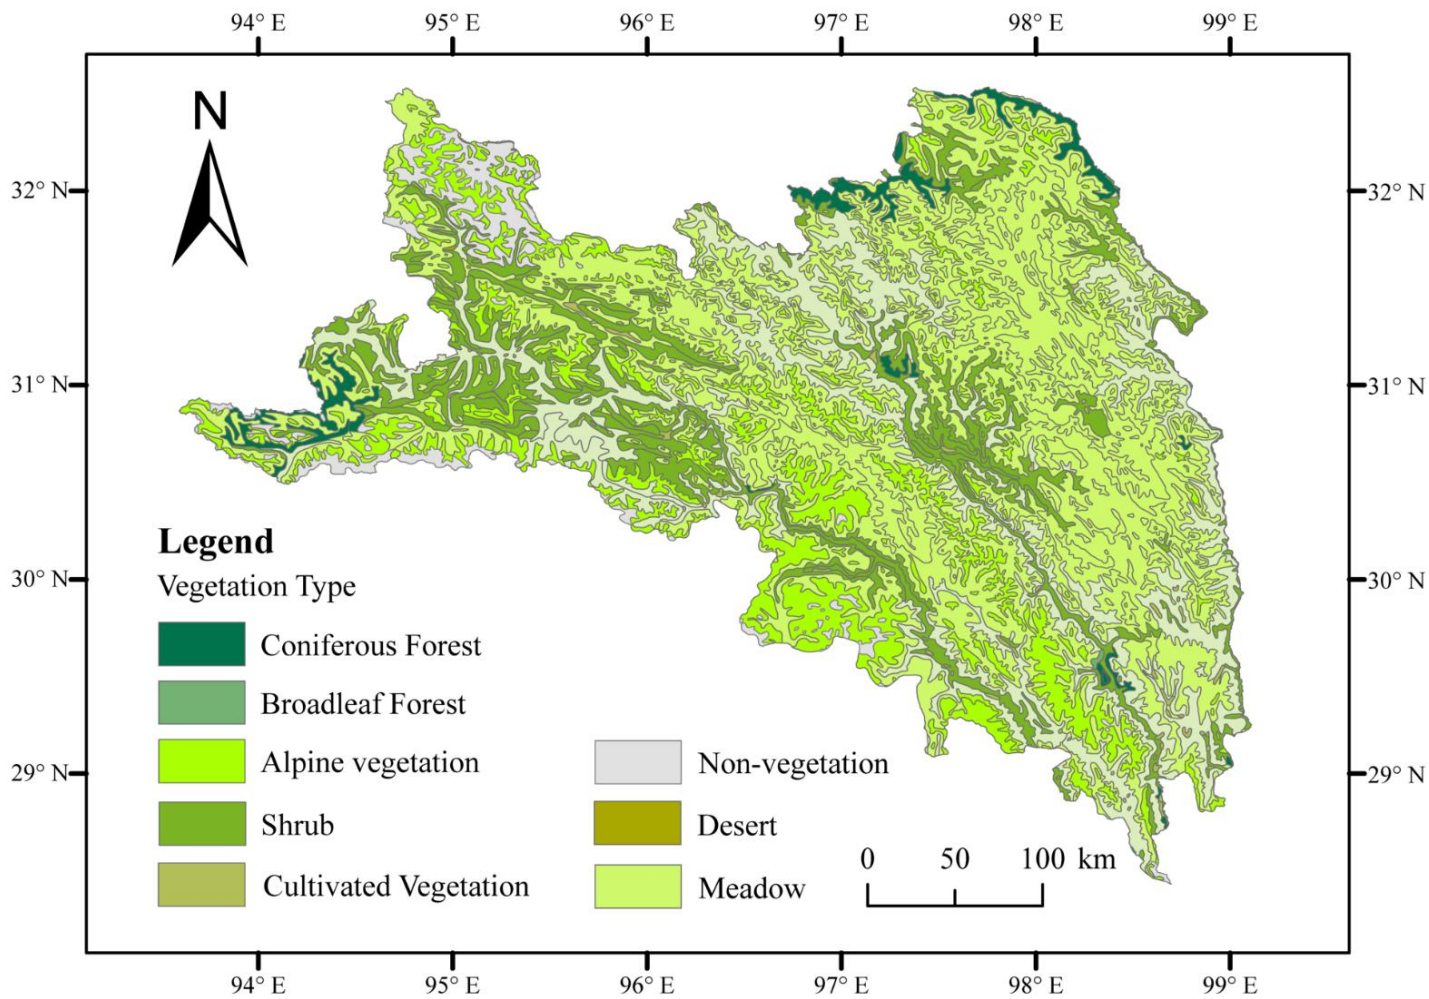

**Figure S5. Vegetation types of the Qamdo prefecture.** It was generated by ArcGIS 10.2 (<http://www.esri.com/>).

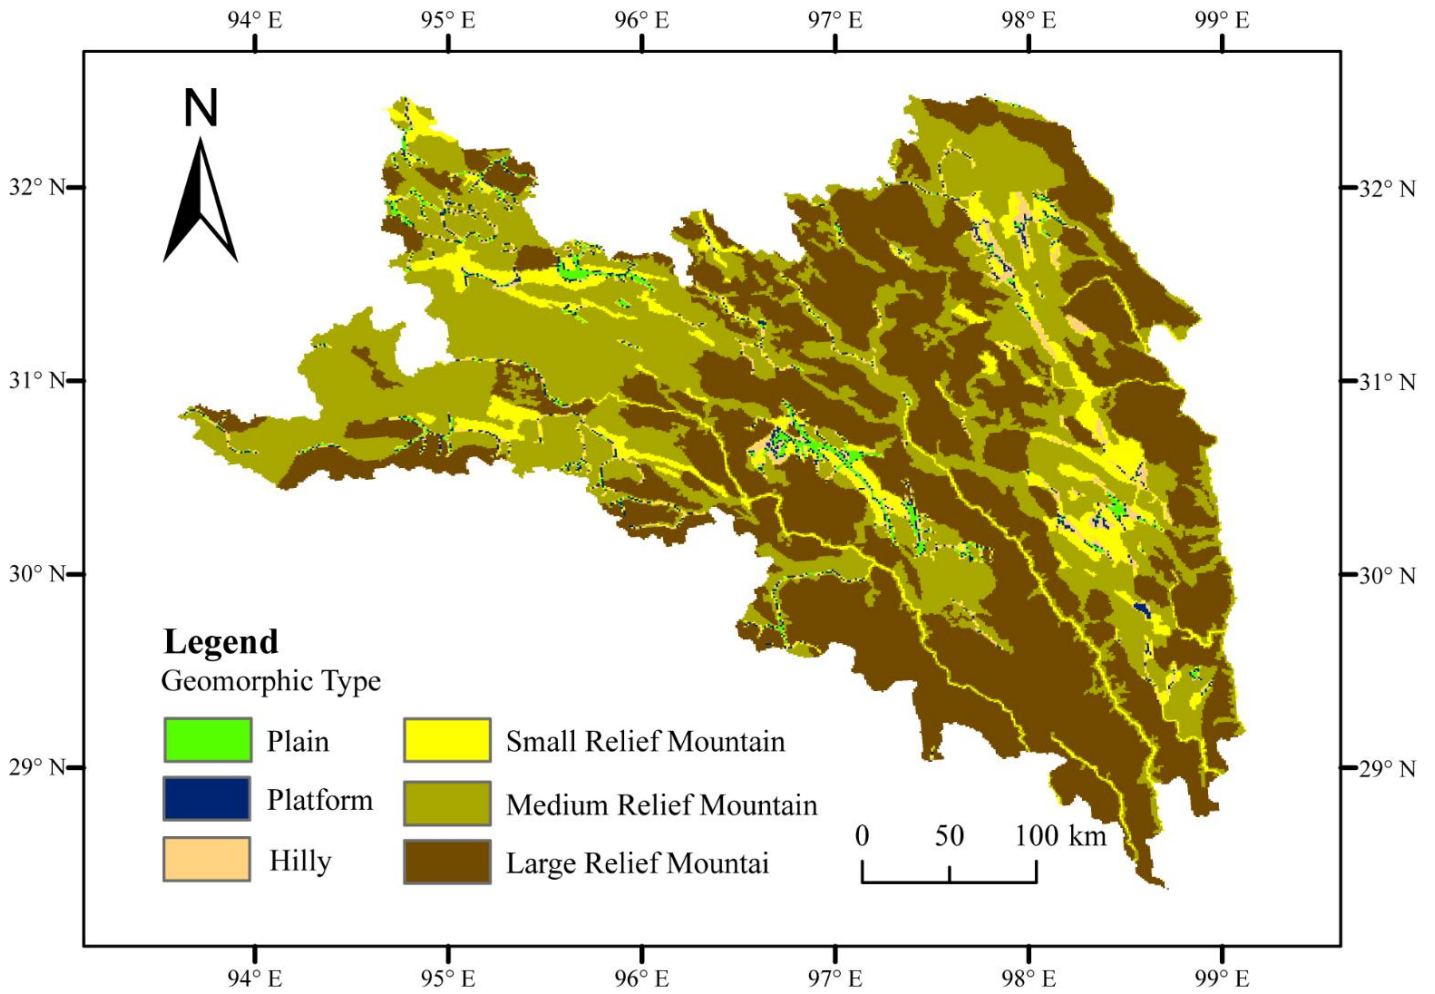

**Figure S6. Geomorphic types of the Qamdo prefecture.** It was generated by ArcGIS 10.2 (<http://www.esri.com/>).



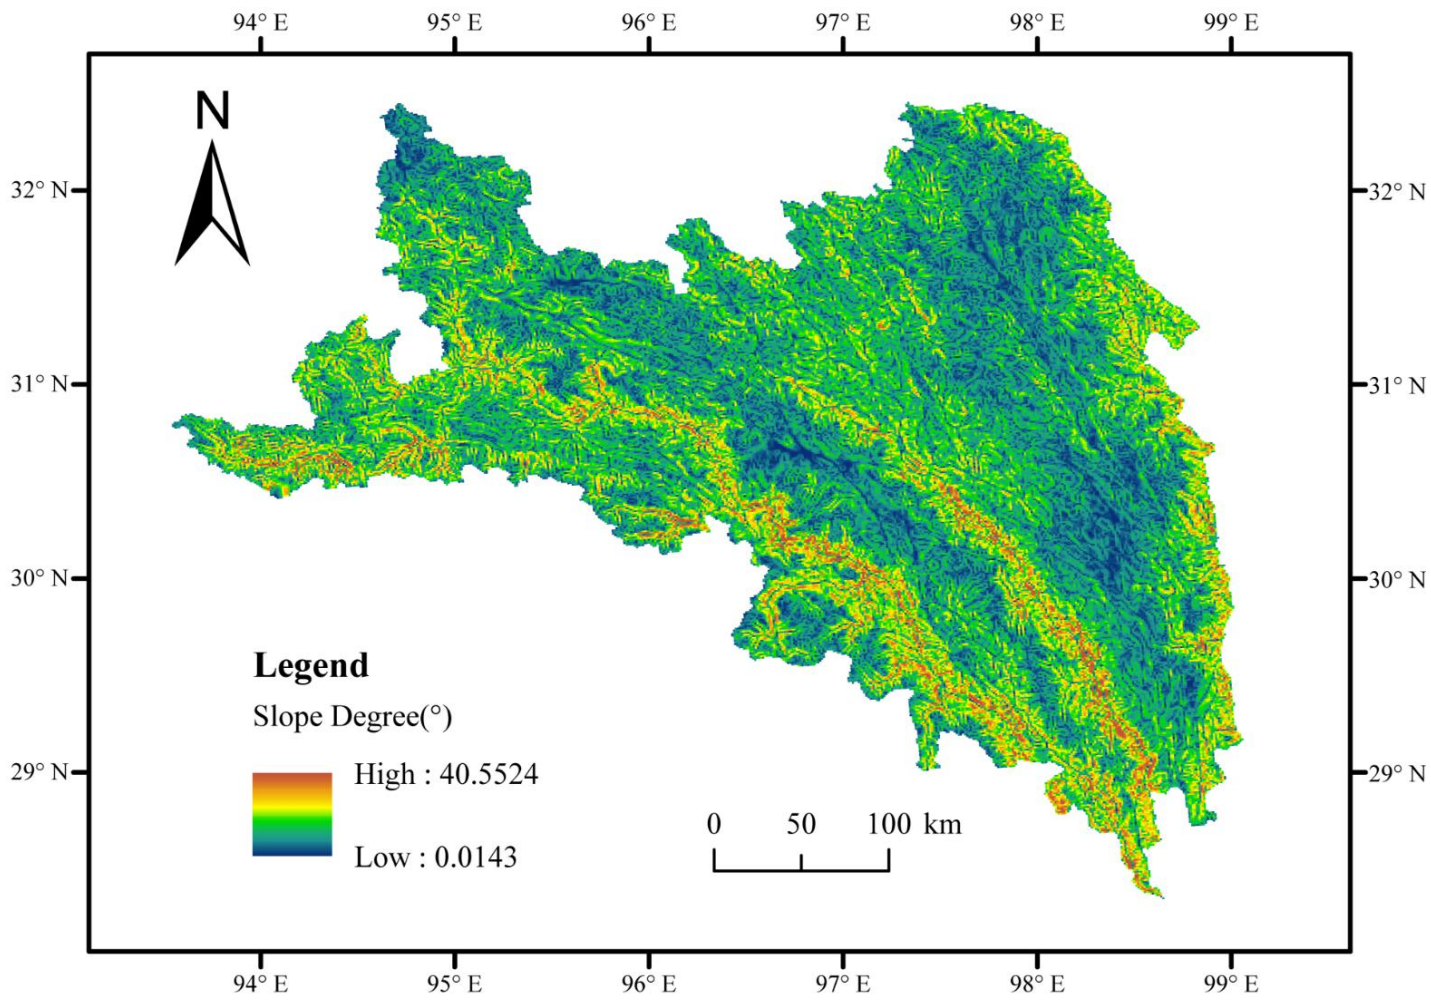

Figure S7. Slope degree of the Qamdo prefecture. It was generated by ArcGIS 10.2 (<http://www.esri.com/>).

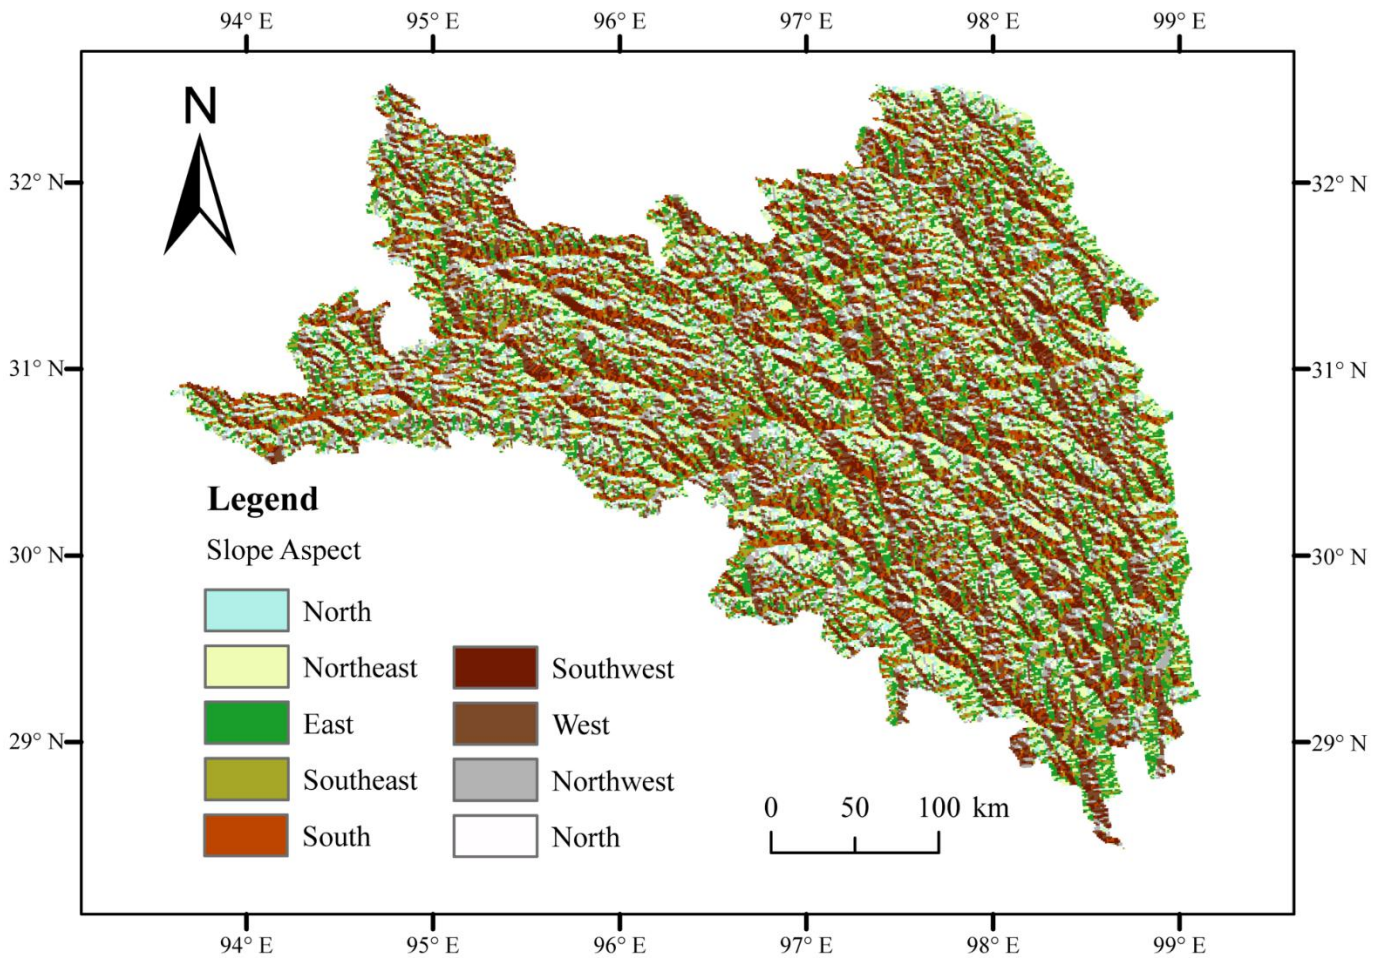

**Figure S8.** Slope aspect of the Qamdo prefecture. It was generated by ArcGIS 10.2 (<http://www.esri.com/>).
